# Supplementary material for: Settling for second best: when should doctors agree to parental demands for suboptimal medical treatment?
Source: PubMed Central journal article supplement (PMC5827708; doi:10.1136/medethics-2016-103461), 2017-09-25
Supplement: medethics-2016-103461supp001.pdf [file medethics-2016-103461supp001.pdf]

There is no difference in the risk of death, but Medicine B has a 10% higher risk of air leak around the lung. If the child develops an air leak they will need a **painful** procedure to drain the air. How much do you agree with the following statement?

You should allow the parents to choose this different treatment for their child.

|                       |                       |                       |                            |                       |                       |                       |
|-----------------------|-----------------------|-----------------------|----------------------------|-----------------------|-----------------------|-----------------------|
| Strongly Disagree     | Disagree              | Somewhat Disagree     | Neither Agree nor Disagree | Somewhat Agree        | Agree                 | Strongly Agree        |
| <input type="radio"/> | <input type="radio"/> | <input type="radio"/> | <input type="radio"/>      | <input type="radio"/> | <input type="radio"/> | <input type="radio"/> |

There is no difference in the risk of complications, but Medicine B has a **higher risk of death**. If 100 infants are treated with Medicine B rather than A, 14 less infants will survive (**only 1 will have their life saved**). How much do you agree with the following statement?

You should allow the parents to choose this different treatment for their child.

|                       |                       |                       |                            |                       |                       |                       |
|-----------------------|-----------------------|-----------------------|----------------------------|-----------------------|-----------------------|-----------------------|
| Strongly Disagree     | Disagree              | Somewhat Disagree     | Neither Agree nor Disagree | Somewhat Agree        | Agree                 | Strongly Agree        |
| <input type="radio"/> | <input type="radio"/> | <input type="radio"/> | <input type="radio"/>      | <input type="radio"/> | <input type="radio"/> | <input type="radio"/> |

There is no difference in the risk of complications, but Medicine B has a **higher risk of death**. If 100 infants are treated with Medicine B rather than A, 9 less infants will survive (**only 6 will have their lives saved**). How much do you agree with the following statement?

You should allow the parents to choose this different treatment for their child.

|                       |                       |                       |                            |                       |                       |                       |
|-----------------------|-----------------------|-----------------------|----------------------------|-----------------------|-----------------------|-----------------------|
| Strongly Disagree     | Disagree              | Somewhat Disagree     | Neither Agree nor Disagree | Somewhat Agree        | Agree                 | Strongly Agree        |
| <input type="radio"/> | <input type="radio"/> | <input type="radio"/> | <input type="radio"/>      | <input type="radio"/> | <input type="radio"/> | <input type="radio"/> |

## SECTION TWO:

In a public healthcare system, there is a finite and often limited amount of resources. Extra money spent on one patient may mean that treatment is not available for another patient.

There parents are low income earners and qualify for Medicaid; a government funded program that provides health coverage to those who are strugglien financially. The treatment of this premature baby is being publicly funded. Medicine A costs \$USD400 per treatment.

For the following scenarios, assume that Medicine B will produce the **same health outcomes** for an infants as Medicine A. However, Medicine B is **more expensive** than Medicine A.

Medicine B costs an **extra \$100** (this is the cost of giving 10 patients a course of antibiotics). How much do you agree with the following statement?

You should allow the parents to choose this different treatment for their child.

|                       |                       |                       |                            |                       |                       |                       |
|-----------------------|-----------------------|-----------------------|----------------------------|-----------------------|-----------------------|-----------------------|
| Strongly Disagree     | Disagree              | Somewhat Disagree     | Neither Agree nor Disagree | Somewhat Agree        | Agree                 | Strongly Agree        |
| <input type="radio"/> | <input type="radio"/> | <input type="radio"/> | <input type="radio"/>      | <input type="radio"/> | <input type="radio"/> | <input type="radio"/> |

Medicine B costs an **extra \$500** (this is the cost of giving 16 patients a yearly flu shot). How much do you agree with the following statement?

You should allow the parents to choose this different treatment for their child.

|                       |                       |                       |                            |                       |                       |                       |
|-----------------------|-----------------------|-----------------------|----------------------------|-----------------------|-----------------------|-----------------------|
| Strongly Disagree     | Disagree              | Somewhat Disagree     | Neither Agree nor Disagree | Somewhat Agree        | Agree                 | Strongly Agree        |
| <input type="radio"/> | <input type="radio"/> | <input type="radio"/> | <input type="radio"/>      | <input type="radio"/> | <input type="radio"/> | <input type="radio"/> |

Medicine B costs an **extra \$1000** (this is the cost of performing 4 abdominal ultrasounds). How much do you agree with the following statement?

You should allow the parents to choose this different treatment for their child.

|                       |                       |                       |                            |                       |                       |                       |
|-----------------------|-----------------------|-----------------------|----------------------------|-----------------------|-----------------------|-----------------------|
| Strongly Disagree     | Disagree              | Somewhat Disagree     | Neither Agree nor Disagree | Somewhat Agree        | Agree                 | Strongly Agree        |
| <input type="radio"/> | <input type="radio"/> | <input type="radio"/> | <input type="radio"/>      | <input type="radio"/> | <input type="radio"/> | <input type="radio"/> |

Medicine B costs an **extra \$10,000** (this is the cost of treatment for a patient with leukaemia for 1 month). How much do you agree with the following statement?

You should allow the parents to choose this different treatment for their child.

|                       |                       |                       |                            |                       |                       |                       |
|-----------------------|-----------------------|-----------------------|----------------------------|-----------------------|-----------------------|-----------------------|
| Strongly Disagree     | Disagree              | Somewhat Disagree     | Neither Agree nor Disagree | Somewhat Agree        | Agree                 | Strongly Agree        |
| <input type="radio"/> | <input type="radio"/> | <input type="radio"/> | <input type="radio"/>      | <input type="radio"/> | <input type="radio"/> | <input type="radio"/> |

Medicine B costs an **extra \$100,000** (this is the cost of performing a complete hip replacement surgery on 5 patients). How much do you agree with the following statement?

You should allow the parents to choose this different treatment for their child.

|                       |                       |                       |                            |                       |                       |                       |
|-----------------------|-----------------------|-----------------------|----------------------------|-----------------------|-----------------------|-----------------------|
| Strongly Disagree     | Disagree              | Somewhat Disagree     | Neither Agree nor Disagree | Somewhat Agree        | Agree                 | Strongly Agree        |
| <input type="radio"/> | <input type="radio"/> | <input type="radio"/> | <input type="radio"/>      | <input type="radio"/> | <input type="radio"/> | <input type="radio"/> |

Medicine B costs an **extra \$1,000,000** (this is the cost of giving a kidney transplant to 4 patients). How much do you agree with the following statement?

You should allow the parents to choose this different treatment for their child.

|                       |                       |                       |                            |                       |                       |                       |
|-----------------------|-----------------------|-----------------------|----------------------------|-----------------------|-----------------------|-----------------------|
| Strongly Disagree     | Disagree              | Somewhat Disagree     | Neither Agree nor Disagree | Somewhat Agree        | Agree                 | Strongly Agree        |
| <input type="radio"/> | <input type="radio"/> | <input type="radio"/> | <input type="radio"/>      | <input type="radio"/> | <input type="radio"/> | <input type="radio"/> |

Medicine B costs an **extra \$1,000,000** (this is the cost of giving a kidney transplant to 4 patients). This is a test question to make sure you are paying attention.

Please leave this question blank.

|                       |                       |                       |                            |                       |                       |                       |
|-----------------------|-----------------------|-----------------------|----------------------------|-----------------------|-----------------------|-----------------------|
| Strongly Disagree     | Disagree              | Somewhat Disagree     | Neither Agree nor Disagree | Somewhat Agree        | Agree                 | Strongly Agree        |
| <input type="radio"/> | <input type="radio"/> | <input type="radio"/> | <input type="radio"/>      | <input type="radio"/> | <input type="radio"/> | <input type="radio"/> |

**SECTION THREE:**

Another couple have had a premature baby who is also in need of Medicine A. They too object to the use of this medication.

The parents have approached you (the doctor) with their request for an alternative treatment. You sit down with them to have a discussion as to **why** they are objecting to this treatment.





The parents request that you continue providing the treatment for 1 month. They are **not religious**. Although they understand that there is only a very small chance of recovery, they hope that their child will defy the odds. How much do you agree with the following statement?

You should continue to provide the treatment

|                       |                       |                       |                            |                       |                       |                       |
|-----------------------|-----------------------|-----------------------|----------------------------|-----------------------|-----------------------|-----------------------|
| Strongly Disagree     | Disagree              | Somewhat Disagree     | Neither Agree nor Disagree | Somewhat Agree        | Agree                 | Strongly Agree        |
| <input type="radio"/> | <input type="radio"/> | <input type="radio"/> | <input type="radio"/>      | <input type="radio"/> | <input type="radio"/> | <input type="radio"/> |

A premature baby is very ill and has a very low blood count (they are severely anaemic). The medical team believe that the baby **requires a blood transfusion** which will improve their chance of survival.

The parents do not wish their child to have a blood transfusions because they are **Jehovah's witnesses**. How much do you agree with the following statement?

You should transfuse the baby against the parents' wishes

|                       |                       |                       |                            |                       |                       |                       |
|-----------------------|-----------------------|-----------------------|----------------------------|-----------------------|-----------------------|-----------------------|
| Strongly Disagree     | Disagree              | Somewhat Disagree     | Neither Agree nor Disagree | Somewhat Agree        | Agree                 | Strongly Agree        |
| <input type="radio"/> | <input type="radio"/> | <input type="radio"/> | <input type="radio"/>      | <input type="radio"/> | <input type="radio"/> | <input type="radio"/> |

The parents do not wish their child to have a blood transfusion because they have read that blood transfusions have a small risk of **transmitting a serious infection** like hepatitis. How much do you agree with the following statement?

You should transfuse the baby against the parents' wishes

|                       |                       |                       |                            |                       |                       |                       |
|-----------------------|-----------------------|-----------------------|----------------------------|-----------------------|-----------------------|-----------------------|
| Strongly Disagree     | Disagree              | Somewhat Disagree     | Neither Agree nor Disagree | Somewhat Agree        | Agree                 | Strongly Agree        |
| <input type="radio"/> | <input type="radio"/> | <input type="radio"/> | <input type="radio"/>      | <input type="radio"/> | <input type="radio"/> | <input type="radio"/> |

## SECTION FIVE:

Please answer the following questions about yourself. This helps us to understand survey responses

Please note that all the information you provide (for the entire questionnaire) is completely anonymous.

1. What is your age?
  - a. 18 – 24 years
  - b. 25 – 34 years
  - c. 35 – 44 years
  - d. 45 – 54 years
  - e. 55 – 64 years
  - f. 65+ years
2. How do you describe your gender?
  - a. Male
  - b. Female
  - c. Other
3. What is your highest level of educational qualification? (If currently enrolled, highest degree received)
  - a. No formal qualification
  - b. Did not complete Secondary School
  - c. Graduated from Secondary School (includes equivalency)
  - d. Vocational qualification (Apprenticeship, etc.)
  - e. Non-tertiary qualification (diploma, associate degree, etc.)
  - f. Undergraduate tertiary qualification (Bachelors)
  - g. Postgraduate tertiary qualification (Honours, Masters, PhD)

4. Are you currently....?
  - a. Employed
  - b. A student
  - c. A homemaker
  - d. Out of work
  - e. Unable to work
  
5. Do you have any children?
  - a. Yes
  - b. No
  
6. What country do you live in? [Drop down box]
  
7. What is your ethnic background?
  - a. Asian
  - b. Australasian
  - c. European
  - d. North American
  - e. South American
  - f. African
  
8. Do you regard yourself as belonging to any particular religion?
  - a. Yes
  - b. No, I'm an atheist
  - c. Not sure
  - d. I'd rather not say
  
9. If YES to question 6, which religion do you belong to?
  - a. Christianity
  - b. Buddhism
  - c. Hinduism
  - d. Islam
  - e. Judaism
  - f. Other
  - g. I'd rather not say
  - h. I selected "No" or "Not sure" for the previous question
  
10. How often do you think about religious issues?
  - a. Never
  - b. Rarely
  - c. Occasionally
  - d. Often
  - e. Very Often
  
11. To what extent do you believe that God or something divine exists?
  - a. Not at all
  - b. Not very much
  - c. Moderately
  - d. Quite a bit
  - e. Very much so
  
12. How often do you take part in religious services?
  - a. Never
  - b. Rarely
  - c. Occasionally
  - d. Often
  - e. Very Often
  
13. How often do you pray?
  - a. Never
  - b. Rarely
  - c. Occasionally
  - d. Often





**Appendix B. Demographic data of respondents [most frequent highlighted].**

| <b>Characteristic</b>    | <b>Breakdown</b>                                                                       | <b>Percentage of total participants</b> |
|--------------------------|----------------------------------------------------------------------------------------|-----------------------------------------|
| <b>Age</b>               | 18-24 years                                                                            | 5.1%                                    |
|                          | 25-34 years                                                                            | 40.4%                                   |
|                          | 35-44 years                                                                            | 25.8%                                   |
|                          | 45-54 years                                                                            | 16.9%                                   |
|                          | 55-64 years                                                                            | 9.0%                                    |
|                          | 65+ years                                                                              | 2.8%                                    |
| <b>Gender</b>            | Male                                                                                   | 41%                                     |
|                          | Female                                                                                 | 59%                                     |
| <b>Education level</b>   | No formal education, Incomplete secondary schooling                                    | 2.3%                                    |
|                          | Secondary School graduate                                                              | 26.4%                                   |
|                          | Non-tertiary qualification (diploma, associate degree, etc.), vocational qualification | 29.7%                                   |
|                          | Undergraduate tertiary qualification                                                   | 30.3%                                   |
|                          | Post-graduate tertiary education                                                       | 11.2%                                   |
| <b>Employment status</b> | Employed                                                                               | 75.3%                                   |
|                          | Out of work or unable to work                                                          | 13.0%                                   |
|                          | Homemaker                                                                              | 7.3%                                    |
|                          | Student                                                                                | 4.5%                                    |
| <b>Children</b>          | Yes                                                                                    | 44.9%                                   |
|                          | No                                                                                     | 55.1%                                   |
| <b>Ethnic Background</b> | North American                                                                         | 60.1%                                   |
|                          | European                                                                               | 28.7%                                   |
|                          | Asian, African, South American, Oceanian                                               | 11.3%                                   |

**Appendix C. Respondent Religion, Religiosity, Dietary preference and Speciesism [most frequent highlighted]**

| <b>Characteristic</b>     | <b>Breakdown</b>                  | <b>Percentage</b> |
|---------------------------|-----------------------------------|-------------------|
| <b>Religion</b>           | Yes                               | 53.4%             |
|                           | Christianity                      | 85.2%             |
|                           | Buddhism                          | 4.1%              |
|                           | Hinduism                          | 1.1%              |
|                           | Judaism                           | 9.6%              |
|                           | No, I'm an atheist                | 38.2%             |
|                           | Not sure                          | 6.2%              |
|                           | I'd rather not say                | 2.2%              |
| <b>Religiosity</b>        | Not Religious (CRS: 1.0 – 2.0)    | 51.1%             |
|                           | Religious (CRS: 2.1 – 3.9)        | 34.8%             |
|                           | Highly Religious (CRS: 4.0 – 5.0) | 14.0%             |
| <b>Dietary Preference</b> | Vegan                             | 1.1%              |
|                           | Vegetarian or semi-vegetarian     | 14.0%             |
|                           | No dietary preference             | 80.3%             |
|                           | Other                             | 4.5%              |
| <b>Speciesism score</b>   | Low speciesism                    | 33.1%             |
|                           | Medium speciesism                 | 65.2%             |
|                           | High speciesism                   | 1.7%              |

**Appendix D. Significance of differences in agreement between participants given a religious reason or ethical reason [\*Significant differences highlighted].**

| No treatment or substitute treatment of reduced efficacy or increased expense | Agreement score for <u>religious</u> reason (M) ± SD | Agreement score for <u>non-religious</u> reason (M) ± SD |
|-------------------------------------------------------------------------------|------------------------------------------------------|----------------------------------------------------------|
| No Treatment                                                                  | 3.91 ± 2.0                                           | 3.70 ± 2.0                                               |
| Substitute Treatment has 10% higher risk of pain                              | 4.35 ± 1.9                                           | 3.93 ± 1.9                                               |
| Treatment that causes 10% higher risk of disability                           | 3.96 ± 2.0                                           | 3.41 ± 1.9                                               |
| Substitute Treatment has small increased risk of death *                      | 4.63 ± 1.9                                           | 3.95 ± 2.0                                               |
| Treatment that causes medium increased risk of death *                        | 4.28 ± 2.0                                           | 3.68 ± 2.0                                               |
| Treatment that causes large increased risk of death *                         | 3.90 ± 2.2                                           | 3.17 ± 1.9                                               |
| \$100                                                                         | 4.90 ± 1.9                                           | 4.63 ± 1.9                                               |
| \$500                                                                         | 4.39 ± 2.0                                           | 4.20 ± 1.9                                               |
| \$1000                                                                        | 4.12 ± 1.9                                           | 3.80 ± 1.9                                               |
| \$10,000                                                                      | 3.46 ± 1.9                                           | 2.94 ± 1.8                                               |
| \$100,000                                                                     | 2.95 ± 1.9                                           | 2.69 ± 1.8                                               |
| \$1,000,000                                                                   | 2.79 ± 1.9                                           | 2.28 ± 1.7                                               |

**Appendix E. Level of agreement to provide substitute treatments of reduced efficacy requested for varying reasons**

| <b>Question<br/>(Reason for requesting a substitute of reduced efficacy)</b> | <b>Agreement score<br/>(M) ± SD</b> | <b>Strongly agree or Agree (%)</b> | <b>Strongly Disagree or Disagree (%)</b> |
|------------------------------------------------------------------------------|-------------------------------------|------------------------------------|------------------------------------------|
| Jewish parents                                                               | 3.91 ± 2.0                          | 28.7%                              | 34.8%                                    |
| Christian parents                                                            | 3.85 ± 2.1                          | 31.5%                              | 37.7%                                    |
| Muslim parents                                                               | 4.04 ± 2.0                          | 31.4%                              | 32.0%                                    |
| Vegan parents                                                                | 3.39 ± 2.0                          | 22.4%                              | 47.1%                                    |
| Parents with an irrational belief                                            | 2.90 ± 1.9                          | 16.9%                              | 59.6%                                    |

**Appendix F. Level of agreement to provide substitute treatments of increased expense requested for varying reasons**

| <b>Question<br/>(Reason for requesting a substitute of increased expense)</b> | <b>Agreement score<br/>(M) ± SD</b> | <b>Strongly agree or Agree (%)</b> | <b>Strongly Disagree or Disagree (%)</b> |
|-------------------------------------------------------------------------------|-------------------------------------|------------------------------------|------------------------------------------|
| Jewish parents                                                                | 4.88 ± 1.7                          | 46.0%                              | 12.4%                                    |
| Christian parents                                                             | 4.75 ± 1.8                          | 44.4%                              | 16.8%                                    |
| Muslim parents                                                                | 4.84 ± 1.8                          | 44.9%                              | 14.6%                                    |
| Vegan parents                                                                 | 4.41 ± 1.9                          | 37.0%                              | 22.5%                                    |
| Parents with an irrational belief                                             | 3.86 ± 2.0                          | 28.7%                              | 35.4%                                    |

**Appendix G. Level of agreement to prolong futile treatment for a religious or non-religious reason**

**Level of agreement to prolong futile treatment and refuse a blood transfusion for religious or non-religious reasons**

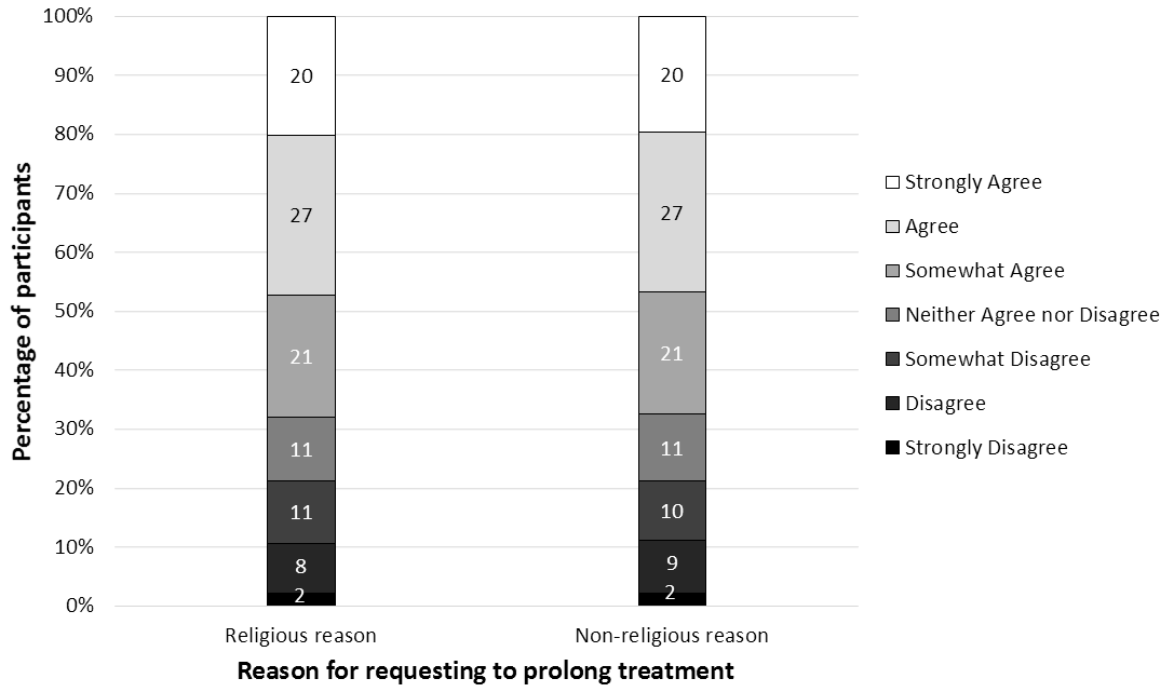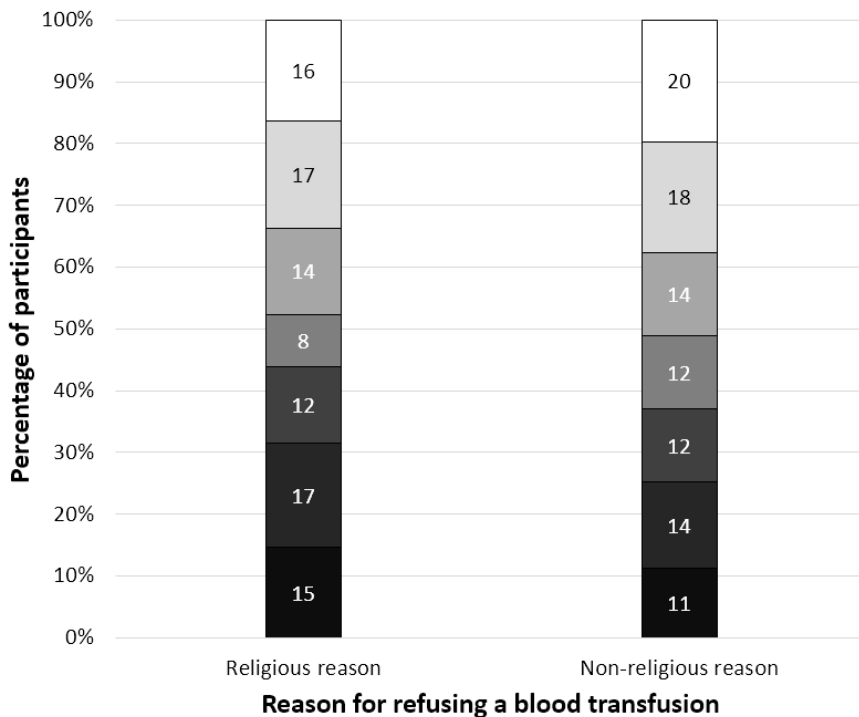

**Appendix H. Comparison of agreement scores between Highly Religious and Not Religious participants**

| Scenario                                    | Reason                            | Not Religious respondents' agreement scores (M) ± SD<br>N=91 | Highly Religious respondents' agreement scores (M) ± SD<br>N=25 |
|---------------------------------------------|-----------------------------------|--------------------------------------------------------------|-----------------------------------------------------------------|
| Choosing a substitute with reduced efficacy | Jewish parents                    | 3.70 ± 1.9                                                   | 4.40 ± 2.0                                                      |
|                                             | Christian parents                 | 3.67 ± 2.1                                                   | 4.60 ± 2.0                                                      |
|                                             | Muslim parents                    | 3.78 ± 2.0                                                   | 4.56 ± 1.9                                                      |
|                                             | Vegan parents                     | 3.13 ± 2.0                                                   | 3.88 ± 2.2                                                      |
|                                             | Parents with an irrational belief | 2.70 ± 1.9                                                   | 3.76 ± 2.1                                                      |
| Choosing a more expensive substitute        | Jewish parents                    | 4.79 ± 1.7                                                   | 5.12 ± 1.7                                                      |
|                                             | Christian parents                 | 4.53 ± 1.9                                                   | 5.32 ± 1.6                                                      |
|                                             | Muslim parents                    | 4.77 ± 1.8                                                   | 5.00 ± 1.8                                                      |
|                                             | Vegan parents                     | 4.33 ± 2.0                                                   | 4.52 ± 2.2                                                      |
|                                             | Parents with an irrational belief | 3.74 ± 2.0                                                   | 4.44 ± 2.0                                                      |
| Prolonging futile treatment                 | Religious                         | 4.78 ± 1.7                                                   | 5.24 ± 1.8                                                      |
|                                             | Non-religious                     | 4.89 ± 1.7                                                   | 5.16 ± 1.9                                                      |
| Refusing a blood transfusion                | Religious                         | 4.38 ± 2.0                                                   | 3.64 ± 2.3                                                      |
|                                             | Non-religious                     | 4.55 ± 1.9                                                   | 3.80 ± 2.3                                                      |
